# Supplementary material for: A Bayesian analysis integrating expert beliefs highlighted the value of eliciting informative priors to better understand how new evidence should change what we believe: a use case of chiropractic care and acute lumbar disc herniation with early surgery
Source: Research Square preprint supplement (doi:10.21203/rs.3.rs-3546564/v1), 2023-11-07
Supplement: Supplementary file 1 [file c9f3cc7ff825a611954920c5.docx]

**Supplementary appendix**

Hofstetter L, Fontana M, Tomlinson GA, Hincapié CA. A Bayesian analysis integrating expert beliefs highlighted the value of eliciting informative priors to better understand how new evidence should change what we believe: a use case of chiropractic care and acute lumbar disc herniation with early surgery (2023).

**eTable 1.** Summaries of the posterior distributions of the incidence rate ratios (IRRs) for acute lumbar disc herniation with early surgery associated with chiropractic care versus primary medical care.

| **Time window** | **Expert beliefs** | **IRR (95% CrI)** | **Probability for benefit** | **Probability for harm** |
| --- | --- | --- | --- | --- |
| Specific outcome definition | | | | |
| 8 weeks | Enthusiastic | 0.56 (0.22 – 1.21) | 93.0 | 7.0 |
| 8 weeks | Neutral | 0.97 (0.42 – 1.61) | 56.1 | 43.9 |
| 8 weeks | Skeptical | 1.40 (0.52 – 2.55) | 20.0 | 80.0 |
| 12 weeks | Enthusiastic | 0.51 (0.20 – 1.06) | 96.5 | 3.5 |
| 12 weeks | Neutral | 0.90 (0.35 – 1.44) | 67.0 | 33.0 |
| 12 weeks | Skeptical | 1.20 (0.41 – 2.13) | 36.6 | 63.4 |
| Sensitive outcome definition | | | | |
| 8 weeks | Enthusiastic | 0.40 (0.21 – 0.72) | 99.9 | 0.1 |
| 8 weeks | Neutral | 0.52 (0.24 – 1.02) | 96.9 | 3.1 |
| 8 weeks | Skeptical | 0.54 (0.24 – 1.07) | 96.5 | 3.5 |
| 12 weeks | Enthusiastic | 0.39 (0.21 – 0.68) | 100.0 | 0.0 |
| 12 weeks | Neutral | 0.48 (0.24 – 0.94) | 98.8 | 1.2 |
| 12 weeks | Skeptical | 0.50 (0.24 – 0.89) | 98.8 | 1.2 |
